# Supplementary material for: Deciphering the role of Hat1 in spermatogenesis: Chromatin organization and beyond
Source: PeerJ journal article supplement (doi:10.7717/peerj.20240), 2025-11-19
Supplement: Sup_4_WB_Expression_of_Hat1_protein.zip [file Expression of Hat1 protein.xlsx]

## Sheet: Sheet1
1	2739	120.481	2	221	329998	329998			1	2040	35.566	0	160	72555	72555
2	2871	124.511	0	214	357472	357472			2	2040	54.13	0	216	110425	110425
3	2970	110.567	0	210	328383	328383			3	1740	41.037	0	150	71405	71405
4	3627	99.178	0	213	359717	359717			4	1638	71.281	0	214	116759	116759
5	3744	90.133	0	220	337457	337457			5	1305	48.935	0	162	63860	63860
6	3404	100.021	0	239	340471	340471			6	1800	65.152	0	223	117273	117273
7	2871	115.743	0	221	332298	332298			7	2158	34.236	0	160	73881	73881
8	3471	108.879	0	214	377919	377919			8	2262	49.803	0	216	112655	112655
9	3393	101.66	2	210	344931	344931			9	1958	37.632	0	150	73683	73683
10	2784	119.497	0	213	332681	332681			10	2314	54.457	0	214	126013	126013
11	2871	110.917	2	220	318442	318442			11	1936	36.754	0	162	71156	71156
12	3478	97.958	0	239	340698	340698			12	2392	52.192	0	223	124843	124843
13	3393	103.592	0	221	351488	351488			13	1870	37.952	0	160	70970	70970
14	3471	108.879	0	214	377919	377919			14	2088	53.04	0	216	110747	110747
15	3393	100.407	1	210	340681	340681			15	2262	33.918	0	150	76723	76723
16	3367	104.118	0	213	350564	350564			16	2436	52.315	0	214	127439	127439
17	2871	110.689	2	220	317789	317789			17	2088	35.012	0	162	73106	73106
18	3330	102.569	0	239	341555	341555			18	1880	62.451	0	223	117407	117407

## Sheet: Sheet2
	内参		目的		72555	110425	73881	112655	70970	110747
					71405	116759	73683	126013	76723	127439
					63860	117273	71156	124843	73106	117407
					73881	112655
					73683	126013
					71156	124843
					70970	110747
					76723	127439
					73106	117407
					329998	357472	内参	329998	357472	332298	377919	351488	377919
					328383	359717		328383	359717	344931	332681	340681	350564
					337457	340471		337457	340471	318442	340698	317789	341555
					332298	377919
					344931	332681		目的					内参
					318442	340698		1	73881	73683	71156		1	357472	359717	340471
					351488	377919		2	110425	116759	117273		2	332298	344931	318442
					340681	350564
					317789	341555
		73881	357472	0.206676	1		1	1.60786
		110425	332298	0.332307	1.60786		1	1.65254
							1	1.76212
		73683	359717	0.204836	1
		116759	344931	0.3385	1.65254
		71156	340471	0.208993	1
		117273	318442	0.368271	1.76212
