# Supplementary material for: Deciphering the role of Hat1 in spermatogenesis: Chromatin organization and beyond
Source: PeerJ. 2025 Nov 19;13:e20240. doi: 10.7717/peerj.20240 (PMC12640128; doi:10.7717/peerj.20240)
Supplement: Supplemental Information 3 [file peerj-13-20240-s003.xlsx]

## Sheet: Sheet1
Color	Position	Sample Name	Gene Name	Condition Name	Cq	Cq Mean	Cq Error	Excluded	Sample Type	Sample Type RQ	Gene Type	Condition Type	Replicate Group	Ratio	Ratio Error	Normalized Ratio	Normalized Ratio Error	Scaled Ratio	Scaled Ratio Error	Dye	Edited Call	Failure	Slope	EPF	Notes	Sample Prep Notes	Number
255;103;103;103	A2	Sample 2	None		31.96	31.96	0	Unchecked	Unknown	Unknown	Target	Unknown		-	-	-	-	-	-	SYBR Green I		No ratio because no reference gene defined	0.91	3.31			2
255;242;138;21	A3	Sample 3	None		32.03	32.03	0	Unchecked	Unknown	Unknown	Target	Unknown		-	-	-	-	-	-	SYBR Green I		No ratio because no reference gene defined	0.93	3.35			3
255;250;215;15	A4	Sample 4	None		31.84	31.84	0	Unchecked	Unknown	Unknown	Target	Unknown		-	-	-	-	-	-	SYBR Green I		No ratio because no reference gene defined	1.05	3.61			4
255;103;154;47	A5	Sample 5	None		29.72	29.72	0	Unchecked	Unknown	Unknown	Target	Unknown		-	-	-	-	-	-	SYBR Green I		No ratio because no reference gene defined	1.11	3.8			5
255;180;73;149	A6	Sample 6	None		30.29	30.29	0	Unchecked	Unknown	Unknown	Target	Unknown		-	-	-	-	-	-	SYBR Green I		No ratio because no reference gene defined	1.16	3.92			6
255;95;103;174	A7	Sample 7	None		29.84	29.84	0	Unchecked	Unknown	Unknown	Target	Unknown		-	-	-	-	-	-	SYBR Green I		No ratio because no reference gene defined	1.03	3.76			7
255;132;197;238	B2	Sample 14	None		30.57	30.57	0	Unchecked	Unknown	Unknown	Target	Unknown		-	-	-	-	-	-	SYBR Green I		No ratio because no reference gene defined	0.97	3.56			14
255;103;103;103	B3	Sample 15	None		30.52	30.52	0	Unchecked	Unknown	Unknown	Target	Unknown		-	-	-	-	-	-	SYBR Green I		No ratio because no reference gene defined	0.91	3.41			15
255;242;138;21	B4	Sample 16	None		30.64	30.64	0	Unchecked	Unknown	Unknown	Target	Unknown		-	-	-	-	-	-	SYBR Green I		No ratio because no reference gene defined	0.91	3.43			16
255;250;215;15	B5	Sample 17	None		30.9	30.9	0	Unchecked	Unknown	Unknown	Target	Unknown		-	-	-	-	-	-	SYBR Green I		No ratio because no reference gene defined	0.92	3.39			17
255;103;154;47	B6	Sample 18	None		31.4	31.4	0	Unchecked	Unknown	Unknown	Target	Unknown		-	-	-	-	-	-	SYBR Green I		No ratio because no reference gene defined	0.84	3.16			18
255;180;73;149	B7	Sample 19	None		31.12	31.12	0	Unchecked	Unknown	Unknown	Target	Unknown		-	-	-	-	-	-	SYBR Green I		No ratio because no reference gene defined	0.85	3.19			19
255;66;41;24	C2	Sample 26	None		33.32	33.32	0	Unchecked	Unknown	Unknown	Target	Unknown		-	-	-	-	-	-	SYBR Green I		No ratio because no reference gene defined	0.92	2.93			26
255;132;197;238	C3	Sample 27	None		33.37	33.37	0	Unchecked	Unknown	Unknown	Target	Unknown		-	-	-	-	-	-	SYBR Green I		No ratio because no reference gene defined	0.92	2.9			27
255;103;103;103	C4	Sample 28	None		33.82	33.82	0	Unchecked	Unknown	Unknown	Target	Unknown		-	-	-	-	-	-	SYBR Green I		No ratio because no reference gene defined	0.96	2.7			28
255;242;138;21	C5	Sample 29	None		33.26	33.26	0	Unchecked	Unknown	Unknown	Target	Unknown		-	-	-	-	-	-	SYBR Green I		No ratio because no reference gene defined	0.9	2.93			29
255;250;215;15	C6	Sample 30	None		33.62	33.62	0	Unchecked	Unknown	Unknown	Target	Unknown		-	-	-	-	-	-	SYBR Green I		No ratio because no reference gene defined	0.81	2.63			30
255;103;154;47	C7	Sample 31	None		32.93	32.93	0	Unchecked	Unknown	Unknown	Target	Unknown		-	-	-	-	-	-	SYBR Green I		No ratio because no reference gene defined	0.96	3.15			31
255;47;73;113	E2	Sample 50	None		23.89	23.89	0	Unchecked	Unknown	Unknown	Target	Unknown		-	-	-	-	-	-	SYBR Green I		No ratio because no reference gene defined	0.62	2.34			50
255;234;79;79	E3	Sample 51	None		24.05	24.05	0	Unchecked	Unknown	Unknown	Target	Unknown		-	-	-	-	-	-	SYBR Green I		No ratio because no reference gene defined	0.65	2.45			51
255;66;41;24	E4	Sample 52	None		23.82	23.82	0	Unchecked	Unknown	Unknown	Target	Unknown		-	-	-	-	-	-	SYBR Green I		No ratio because no reference gene defined	0.66	2.46			52
255;132;197;238	E5	Sample 53	None		23.6	23.6	0	Unchecked	Unknown	Unknown	Target	Unknown		-	-	-	-	-	-	SYBR Green I		No ratio because no reference gene defined	0.73	2.45			53
255;103;103;103	E6	Sample 54	None		23.47	23.47	0	Unchecked	Unknown	Unknown	Target	Unknown		-	-	-	-	-	-	SYBR Green I		No ratio because no reference gene defined	0.81	2.62			54
255;242;138;21	E7	Sample 55	None		23.59	23.59	0	Unchecked	Unknown	Unknown	Target	Unknown		-	-	-	-	-	-	SYBR Green I		No ratio because no reference gene defined	0.77	2.53			55
255;34;176;146	F2	Sample 62	None		25.58	25.58	0	Unchecked	Unknown	Unknown	Target	Unknown		-	-	-	-	-	-	SYBR Green I		No ratio because no reference gene defined	0.96	3.18			62
255;47;73;113	F3	Sample 63	None		25.54	25.54	0	Unchecked	Unknown	Unknown	Target	Unknown		-	-	-	-	-	-	SYBR Green I		No ratio because no reference gene defined	0.94	3.1			63
255;234;79;79	F4	Sample 64	None		25.56	25.56	0	Unchecked	Unknown	Unknown	Target	Unknown		-	-	-	-	-	-	SYBR Green I		No ratio because no reference gene defined	1.01	3.25			64
255;66;41;24	F5	Sample 65	None		24.37	24.37	0	Unchecked	Unknown	Unknown	Target	Unknown		-	-	-	-	-	-	SYBR Green I		No ratio because no reference gene defined	1.01	3.15			65
255;132;197;238	F6	Sample 66	None		24.42	24.42	0	Unchecked	Unknown	Unknown	Target	Unknown		-	-	-	-	-	-	SYBR Green I		No ratio because no reference gene defined	0.95	3.05			66
255;103;103;103	F7	Sample 67	None		24.43	24.43	0	Unchecked	Unknown	Unknown	Target	Unknown		-	-	-	-	-	-	SYBR Green I		No ratio because no reference gene defined	0.95	3.04			67
255;205;18;55	G2	Sample 74	None		27.43	27.43	0	Unchecked	Unknown	Unknown	Target	Unknown		-	-	-	-	-	-	SYBR Green I		No ratio because no reference gene defined	0.84	3.01			74
255;34;176;146	G3	Sample 75	None		27.31	27.31	0	Unchecked	Unknown	Unknown	Target	Unknown		-	-	-	-	-	-	SYBR Green I		No ratio because no reference gene defined	0.82	2.98			75
255;47;73;113	G4	Sample 76	None		26.96	26.96	0	Unchecked	Unknown	Unknown	Target	Unknown		-	-	-	-	-	-	SYBR Green I		No ratio because no reference gene defined	0.83	2.99			76
255;234;79;79	G5	Sample 77	None		27.43	27.43	0	Unchecked	Unknown	Unknown	Target	Unknown		-	-	-	-	-	-	SYBR Green I		No ratio because no reference gene defined	0.77	2.84			77
255;66;41;24	G6	Sample 78	None		27.26	27.26	0	Unchecked	Unknown	Unknown	Target	Unknown		-	-	-	-	-	-	SYBR Green I		No ratio because no reference gene defined	0.78	2.85			78
255;132;197;238	G7	Sample 79	None		27.43	27.43	0	Unchecked	Unknown	Unknown	Target	Unknown		-	-	-	-	-	-	SYBR Green I		No ratio because no reference gene defined	0.75	2.74			79
