# Supplementary figures and images for: Deciphering the role of Hat1 in spermatogenesis: Chromatin organization and beyond
Source: PeerJ journal article supplement (doi:10.7717/peerj.20240), 2025-11-19

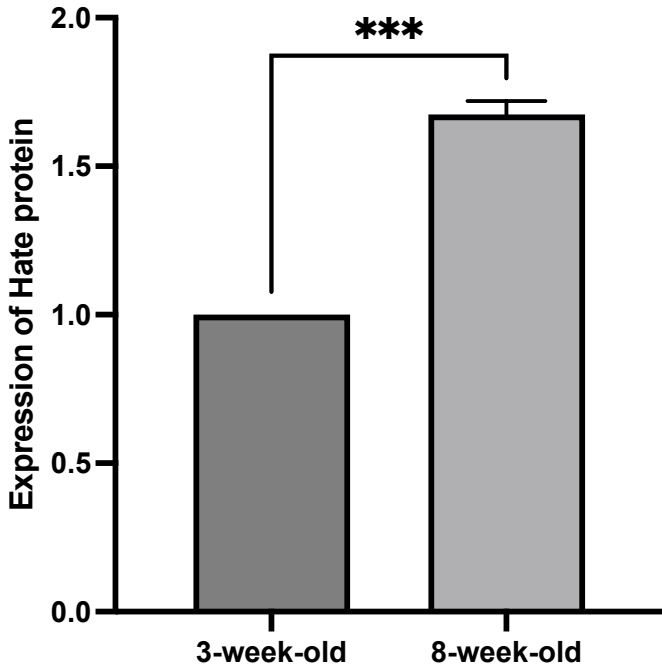

Supplement: Sup_4_WB_Expression_of_Hat1_protein.zip [file Expression of Hat1 protein.pdf › Expression of Hat1 protein.pdf]

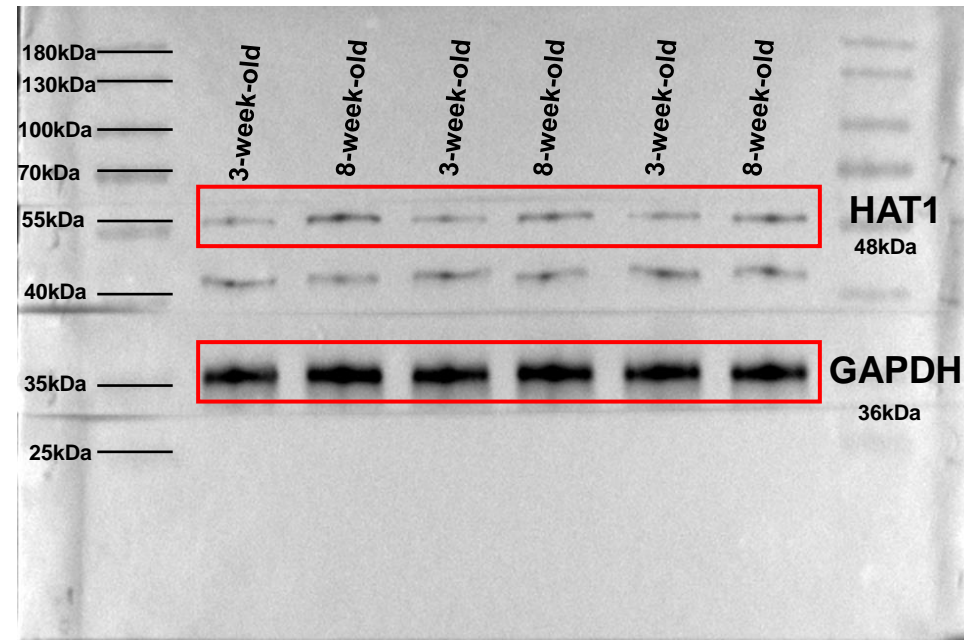

Supplement: WB_whole_film.zip [file WB-1.pdf › 3-integral film/WB-1.pdf]

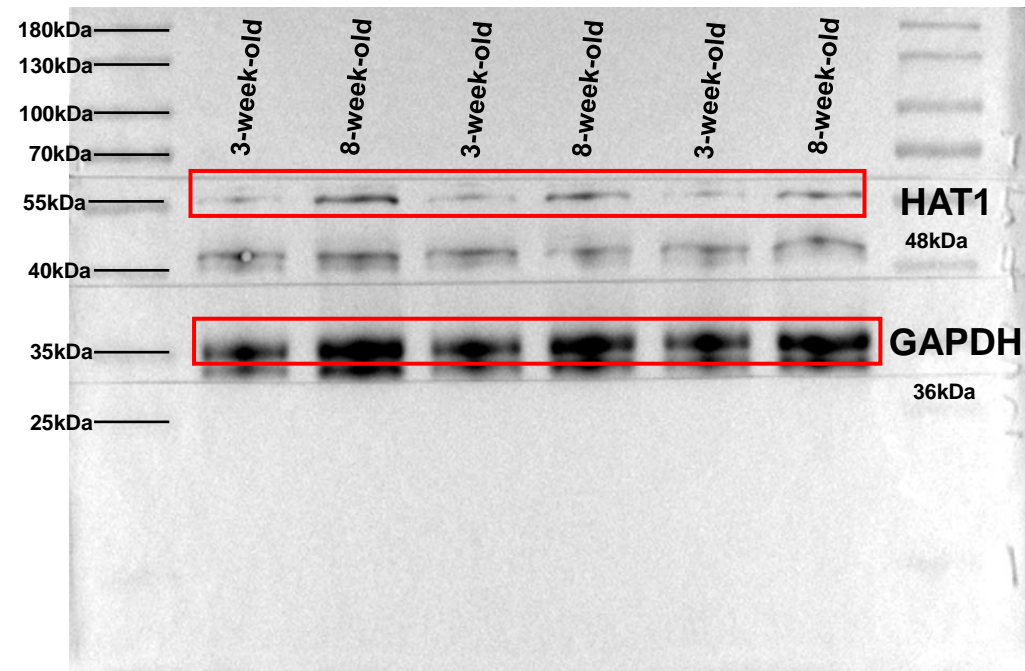

Supplement: WB_whole_film.zip [file WB-2.pdf › 3-integral film/WB-2.pdf]

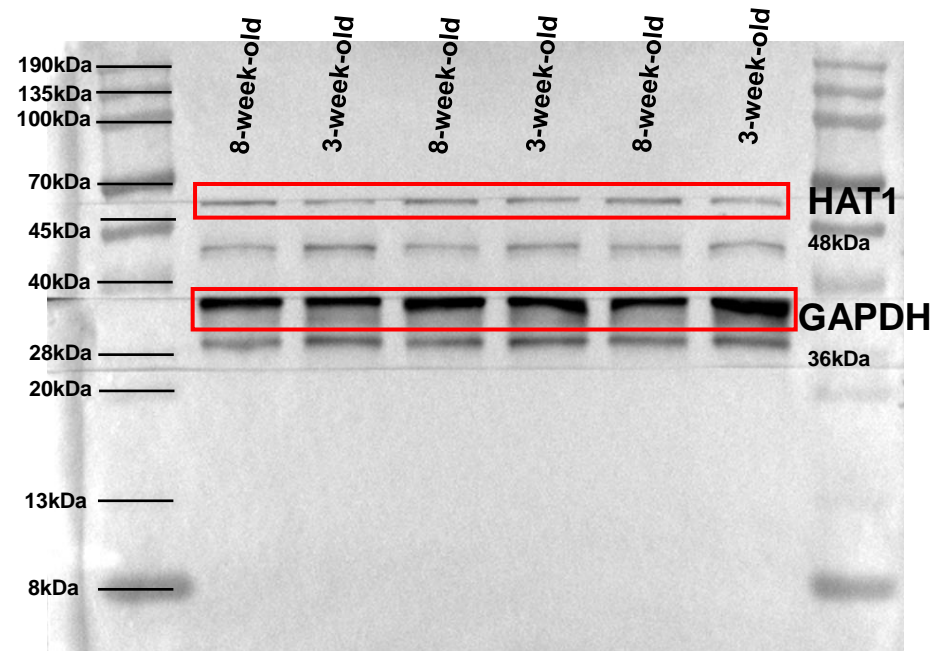

Supplement: WB_whole_film.zip [file WB-3.pdf › 3-integral film/WB-3.pdf]

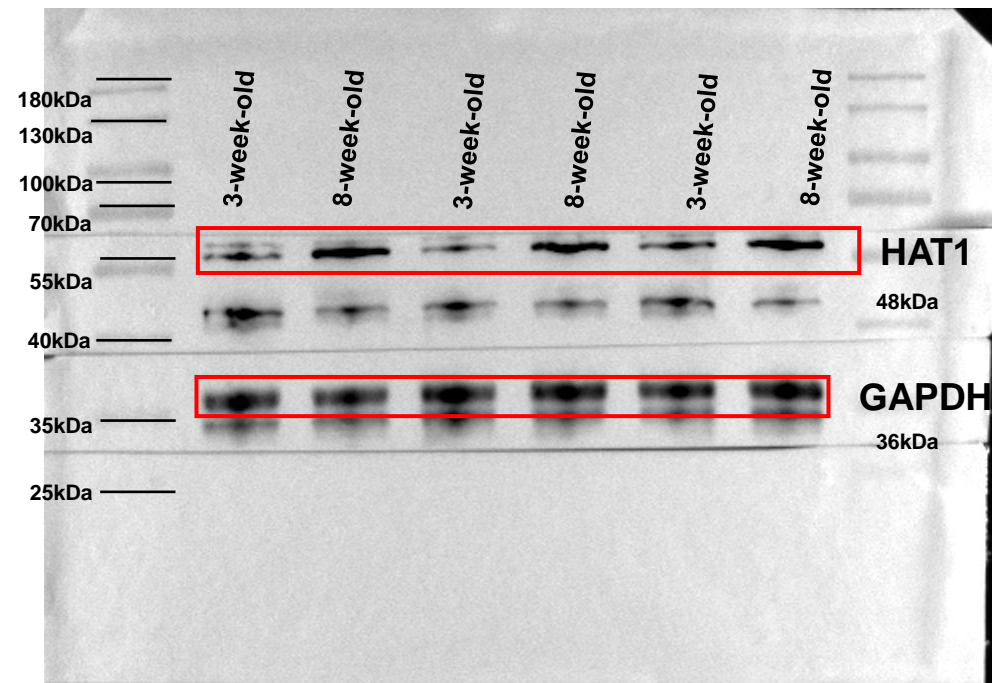

Supplement: WB_whole_film.zip [file WB-4 .pdf › 3-integral film/WB-4 .pdf]

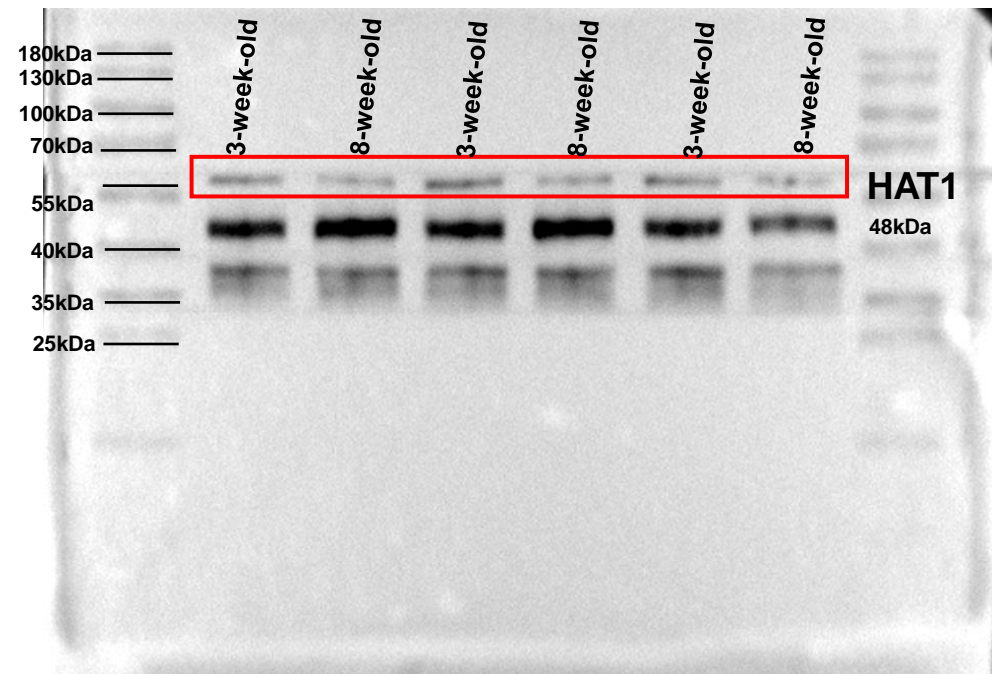

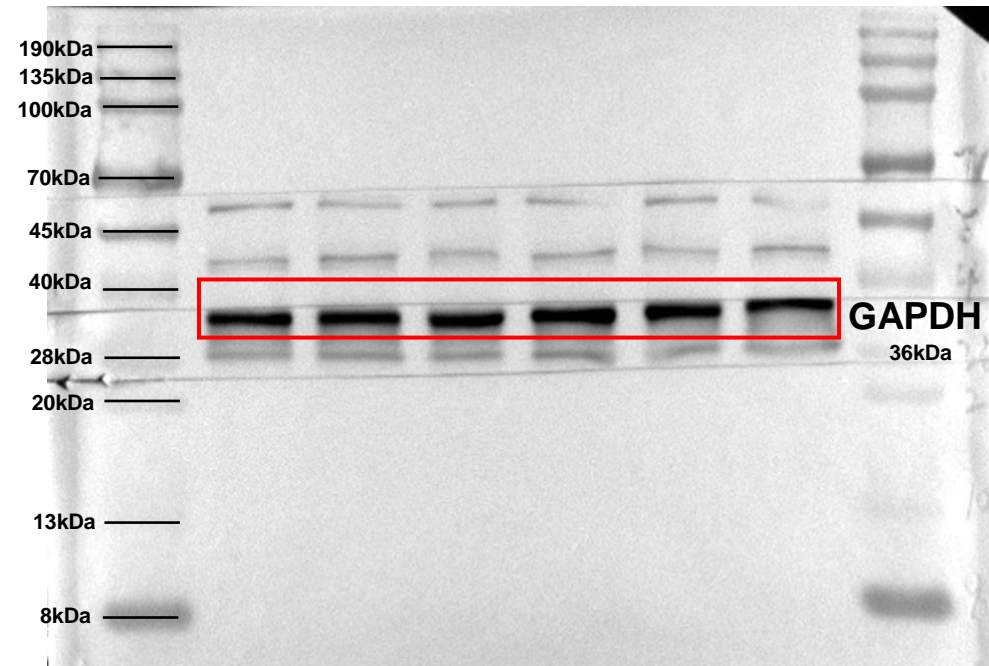

Supplement: WB_whole_film.zip [file WB-5.pdf › 3-integral film/WB-5.pdf]
